# Supplementary material
Source: PubMed Central journal article supplement (PMC8262107)
Supplement: NIHMS1716155-supplement-supporting_figures.pdf [file NIHMS1716155-supplement-supporting_figures.pdf]

# Supporting Information

## Ubiquitin Ligase Activities of WWP1 Germline Variants K740N and N745S

Hanjie Jiang<sup>1,2</sup>, Daniel R. Dempsey<sup>1</sup>, Philip A. Cole<sup>1,2</sup>

<sup>1</sup>Division of Genetics, Department of Medicine, Brigham and Women's Hospital, Department of Biological Chemistry and Molecular Pharmacology, Harvard Medical School, Boston, MA 02115; <sup>2</sup>Department of Pharmacology and Molecular Sciences, Johns Hopkins School of Medicine, Baltimore, MD 21205;

# Supplemental Figure S1

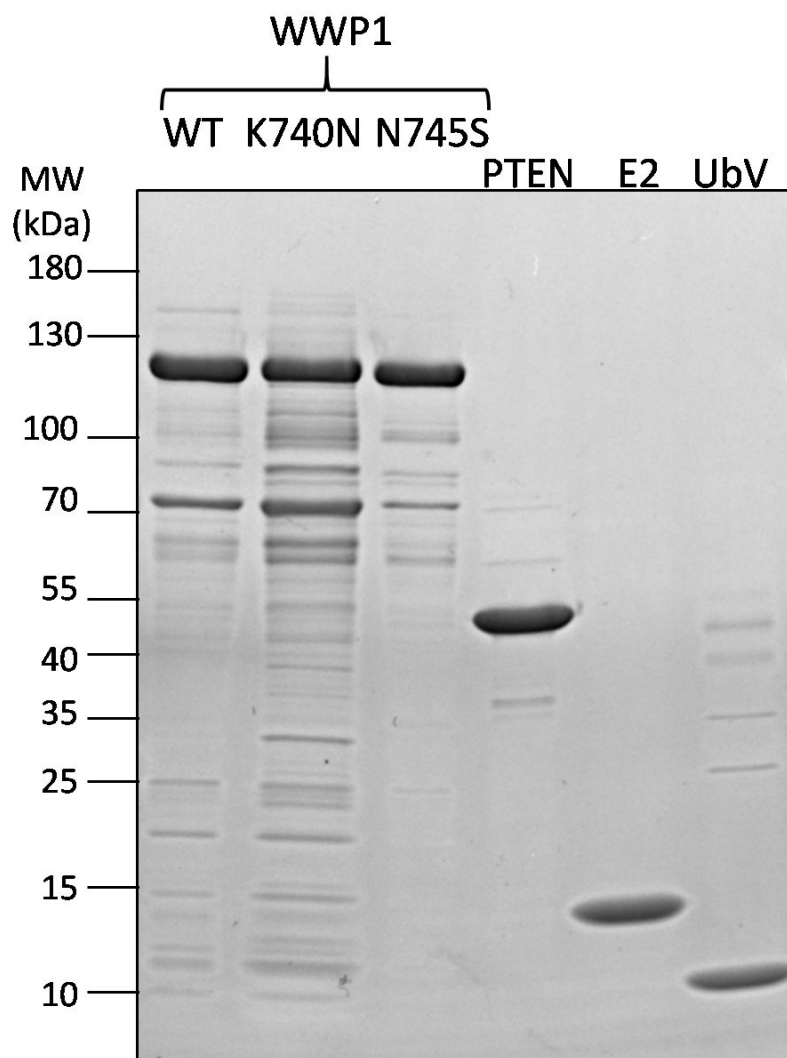

**Figure S1.** Coomassie stained SDS-PAGE showing purified proteins that were used for ubiquitination assays with WWP1.
